# Supplementary material for: Structure-activity relationship study on artificial CXCR4 ligands possessing the cyclic pentapeptide scaffold: the exploration of amino acid residues of pentapeptides by substitutions of several aromatic amino acids
Source: Royal Society of Chemistry journal article supplement (doi:10.1039/b908286g), 2009-01-01
Supplement: b908286g.pdf [file b908286g.pdf]

Table S1. Characterization data of novel synthetic compounds

| Compound no.          | $[\alpha]_D^a$ | c (g/dL) | temp. | Formula                                                           | HRMS (MH) <sup>+b</sup> |          |
|-----------------------|----------------|----------|-------|-------------------------------------------------------------------|-------------------------|----------|
|                       |                |          |       |                                                                   | Calcd.                  | Found    |
| <b>7</b>              | +2.02          | 0.248    | 25.3  | C <sub>36</sub> H <sub>47</sub> N <sub>11</sub> O <sub>5</sub> F  | 732.3746                | 732.3740 |
| <b>8</b>              | -41.13         | 0.282    | 25.3  | C <sub>36</sub> H <sub>47</sub> N <sub>11</sub> O <sub>5</sub> F  | 732.3746                | 732.3755 |
| <b>9</b>              | -1.71          | 0.234    | 25.4  | C <sub>36</sub> H <sub>47</sub> N <sub>11</sub> O <sub>5</sub> F  | 732.3746                | 732.3726 |
| <b>10</b>             | -34.71         | 0.265    | 27.0  | C <sub>43</sub> H <sub>53</sub> N <sub>11</sub> O <sub>6</sub> F  | 838.4164                | 838.4180 |
| <b>11</b>             | -61.71         | 0.222    | 26.9  | C <sub>36</sub> H <sub>47</sub> N <sub>11</sub> O <sub>5</sub> Cl | 748.3450                | 748.3444 |
| <b>12</b>             | -51.79         | 0.139    | 26.8  | C <sub>36</sub> H <sub>47</sub> N <sub>11</sub> O <sub>5</sub> Br | 792.2945                | 792.2939 |
| <b>13</b>             | -41.11         | 0.090    | 26.9  | C <sub>36</sub> H <sub>47</sub> N <sub>11</sub> O <sub>5</sub> F  | 732.3746                | 732.3734 |
| <b>14</b>             | -53.52         | 0.213    | 26.9  | C <sub>36</sub> H <sub>47</sub> N <sub>11</sub> O <sub>5</sub> F  | 732.3746                | 732.3752 |
| <b>15<sup>c</sup></b> |                |          |       | C <sub>35</sub> H <sub>46</sub> N <sub>11</sub> O <sub>5</sub>    | 700.3683                | 700.3691 |
| <b>16</b>             | -60.87         | 0.161    | 24.3  | C <sub>34</sub> H <sub>46</sub> N <sub>11</sub> O <sub>5</sub> S  | 720.3404                | 720.3412 |
| <b>18</b>             | -33.97         | 0.259    | 25.2  | C <sub>36</sub> H <sub>47</sub> N <sub>11</sub> O <sub>5</sub> Cl | 748.3450                | 748.3458 |
| <b>19</b>             | -35.16         | 0.236    | 25.2  | C <sub>36</sub> H <sub>47</sub> N <sub>11</sub> O <sub>5</sub> Br | 792.2945                | 792.2955 |
| <b>20</b>             | -58.02         | 0.212    | 25.0  | C <sub>36</sub> H <sub>47</sub> N <sub>12</sub> O <sub>7</sub>    | 759.3691                | 759.3680 |
| <b>21</b>             | -52.24         | 0.245    | 25.0  | C <sub>36</sub> H <sub>48</sub> N <sub>11</sub> O <sub>6</sub>    | 730.3789                | 730.3776 |
| <b>22</b>             | -53.27         | 0.214    | 25.2  | C <sub>36</sub> H <sub>49</sub> N <sub>12</sub> O <sub>5</sub>    | 729.3949                | 729.3962 |
| <b>23</b>             | -12.59         | 0.127    | 25.2  | C <sub>36</sub> H <sub>47</sub> N <sub>11</sub> O <sub>5</sub> F  | 732.3746                | 732.3726 |
| <b>24</b>             | -38.43         | 0.281    | 25.1  | C <sub>36</sub> H <sub>47</sub> N <sub>11</sub> O <sub>5</sub> F  | 732.3746                | 732.3753 |
| <b>25</b>             | -138.89        | 0.036    | 24.8  | C <sub>40</sub> H <sub>47</sub> N <sub>8</sub> O <sub>6</sub>     | 735.3619                | 735.3622 |
| <b>26<sup>d</sup></b> | -66.66         | 0.243    | 25.2  | C <sub>38</sub> H <sub>43</sub> N <sub>8</sub> O <sub>6</sub>     | 707.3306                | 707.3300 |
| <b>27<sup>d</sup></b> | -79.81         | 0.327    | 25.4  | C <sub>38</sub> H <sub>43</sub> N <sub>8</sub> O <sub>6</sub>     | 707.3306                | 707.3313 |
| <b>28</b>             | -58.61         | 0.301    | 25.4  | C <sub>36</sub> H <sub>43</sub> N <sub>10</sub> O <sub>6</sub>    | 711.3367                | 711.3364 |
| <b>29</b>             | -42.42         | 0.198    | 25.4  | C <sub>36</sub> H <sub>43</sub> N <sub>10</sub> O <sub>6</sub>    | 711.3367                | 711.3359 |
| <b>30</b>             | -61.25         | 0.214    | 27.0  | C <sub>36</sub> H <sub>43</sub> N <sub>10</sub> O <sub>6</sub>    | 711.3367                | 711.3378 |
| <b>31</b>             | -54.95         | 0.134    | 26.3  | C <sub>36</sub> H <sub>43</sub> N <sub>9</sub> O <sub>6</sub>     | 692.2945                | 692.2941 |
| <b>32</b>             | -44.53         | 0.119    | 25.1  | C <sub>33</sub> H <sub>46</sub> N <sub>13</sub> O <sub>5</sub>    | 704.3745                | 704.3750 |
| <b>33</b>             | -36.56         | 0.134    | 24.0  | C <sub>33</sub> H <sub>46</sub> N <sub>13</sub> O <sub>5</sub>    | 704.3745                | 704.3738 |
| <b>34</b>             | -47.18         | 0.267    | 25.1  | C <sub>34</sub> H <sub>46</sub> N <sub>11</sub> O <sub>5</sub> S  | 720.3404                | 720.3417 |
| <b>35</b>             | -39.48         | 0.157    | 24.7  | C <sub>39</sub> H <sub>49</sub> N <sub>12</sub> O <sub>5</sub>    | 765.3949                | 765.3964 |
| <b>36</b>             | -42.44         | 0.278    | 25.5  | C <sub>37</sub> H <sub>50</sub> N <sub>11</sub> O <sub>5</sub>    | 728.3996                | 728.4012 |
| <b>37<sup>c</sup></b> |                |          |       | C <sub>35</sub> H <sub>46</sub> N <sub>11</sub> O <sub>5</sub>    | 700.3683                | 700.3676 |
| <b>38</b>             | -63.77         | 0.196    | 26.6  | C <sub>36</sub> H <sub>42</sub> N <sub>10</sub> O <sub>5</sub> F  | 713.3324                | 713.3317 |
| <b>39</b>             | -45.02         | 0.191    | 26.8  | C <sub>36</sub> H <sub>42</sub> N <sub>10</sub> O <sub>5</sub> F  | 713.3324                | 713.3320 |
| <b>40</b>             | -51.78         | 0.224    | 26.9  | C <sub>36</sub> H <sub>37</sub> N <sub>9</sub> O <sub>5</sub> F   | 694.2902                | 694.2893 |
| <b>41</b>             | -69.54         | 0.174    | 27.0  | C <sub>36</sub> H <sub>42</sub> N <sub>10</sub> O <sub>5</sub> F  | 713.3324                | 713.3336 |
| <b>42</b>             | -32.81         | 0.259    | 27.0  | C <sub>36</sub> H <sub>42</sub> N <sub>10</sub> O <sub>5</sub> F  | 713.3324                | 713.3312 |
| <b>43</b>             | -65.57         | 0.183    | 27.0  | C <sub>36</sub> H <sub>37</sub> N <sub>9</sub> O <sub>5</sub> F   | 694.2902                | 694.2907 |

<sup>a</sup>Optical rotations were measured in H<sub>2</sub>O with a Horiba high-sensitive polarimeter SEPA-200 (Kyoto, Japan).

<sup>b</sup>Exact mass (HRMS) spectra were recorded on a JEOLJMS-01SG -2 or JMS-HX/HX 110A mass spectrometer.

<sup>c</sup>Compounds **15** and **37** were prepared as racemic mixtures containing L/D-Phg since HPLC peaks of the corresponding diastereomers were proximate.

<sup>d</sup>The structures of compounds **26** and **27** were determined tentatively by yields of HPLC separation in the synthesis using Fmoc-L-Phg-OH.

**Compd. 7 H<sub>2</sub>O/CH<sub>3</sub>CN = 78 : 22**

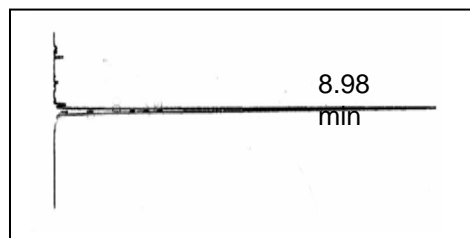

**Compd. 11 H<sub>2</sub>O/CH<sub>3</sub>CN = 69 : 31**

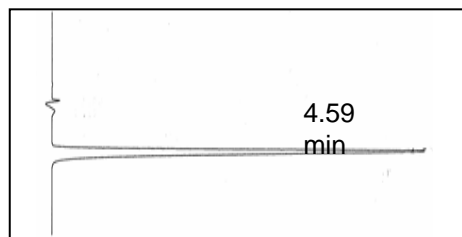

**Compd. 15 H<sub>2</sub>O/CH<sub>3</sub>CN = 72 : 28**

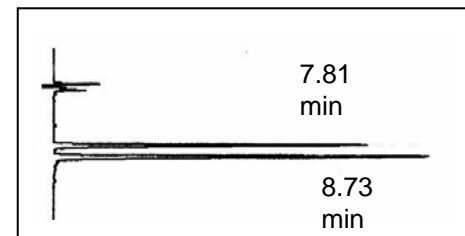

**Compd. 8 H<sub>2</sub>O/CH<sub>3</sub>CN = 72 : 28**

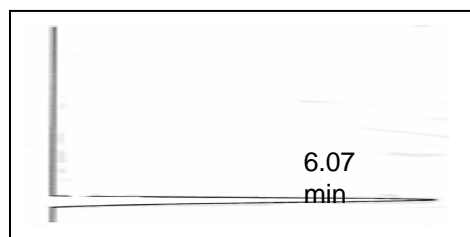

**Compd. 12 H<sub>2</sub>O/CH<sub>3</sub>CN = 70 : 30**

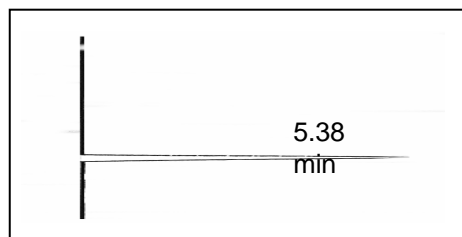

**Compd. 16 H<sub>2</sub>O/CH<sub>3</sub>CN = 76 : 24**

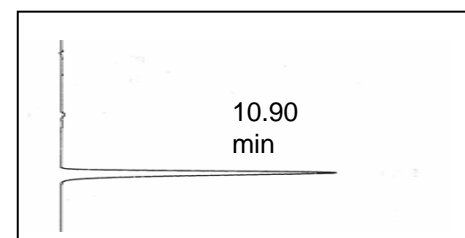

**Compd. 9 H<sub>2</sub>O/CH<sub>3</sub>CN = 68 : 32**

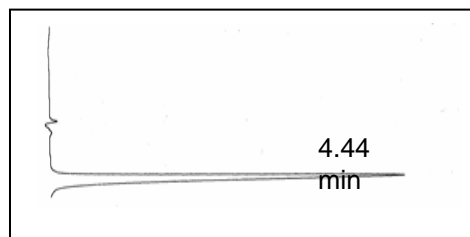

**Compd. 13 H<sub>2</sub>O/CH<sub>3</sub>CN = 71 : 29**

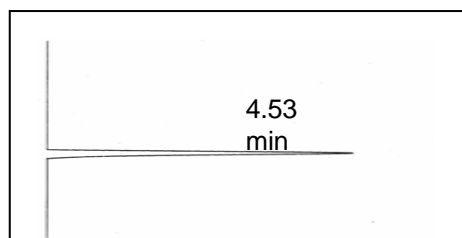

**Compd. 18 H<sub>2</sub>O/CH<sub>3</sub>CN = 72 : 28**

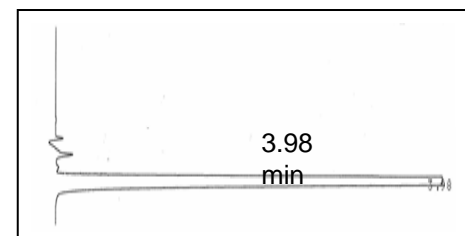

**Compd. 10 H<sub>2</sub>O/CH<sub>3</sub>CN = 64 : 36**

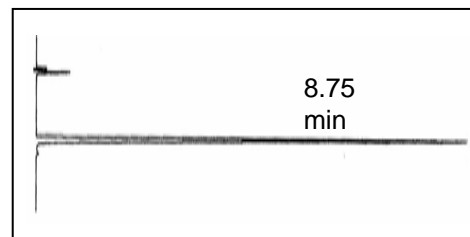

**Compd. 14 H<sub>2</sub>O/CH<sub>3</sub>CN = 71 : 29**

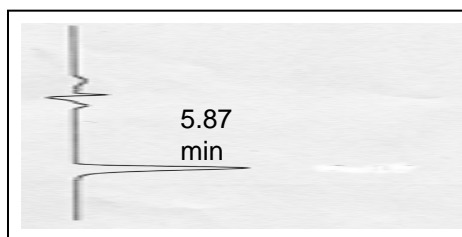

**Compd. 19 H<sub>2</sub>O/CH<sub>3</sub>CN = 79 : 21**

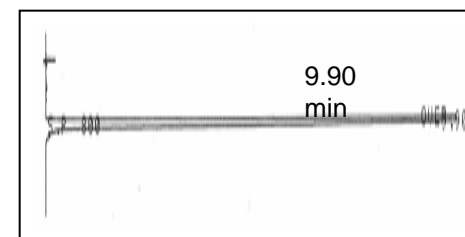

**Fig. S1. HPLC charts of purified samples of novel synthetic compounds 7-19.**

HPLC solvents were H<sub>2</sub>O and CH<sub>3</sub>CN, both containing 0.1% (v/v) TFA. A Cosmosil 5C18-AR column (4.6 × 250 mm, Nacalai Tesque Inc., Kyoto, Japan) was eluted with an isocratic mode (shown above each HPLC profile) at a flow rate of 1 mL/min on a Shimadzu LC-10ADvp (Shimadzu corporation, Ltd., Kyoto, Japan).

Compd. 20 H<sub>2</sub>O/CH<sub>3</sub>CN = 73 : 27

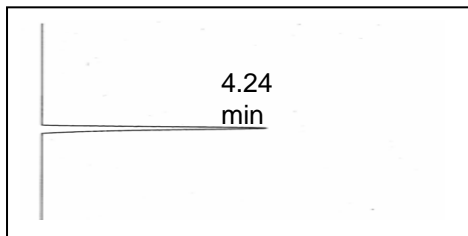

Compd. 24 H<sub>2</sub>O/CH<sub>3</sub>CN = 74 : 26

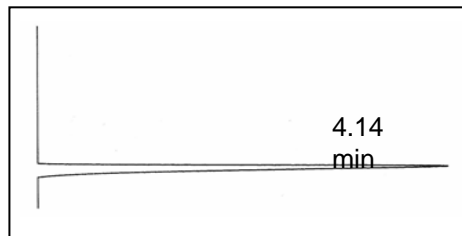

Compd. 28 H<sub>2</sub>O/CH<sub>3</sub>CN = 71 : 29

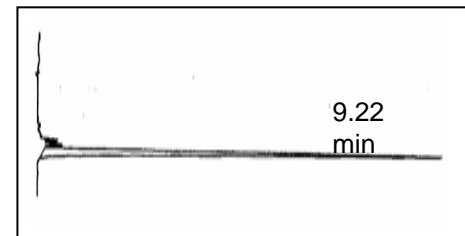

Compd. 21 H<sub>2</sub>O/CH<sub>3</sub>CN = 78 : 22

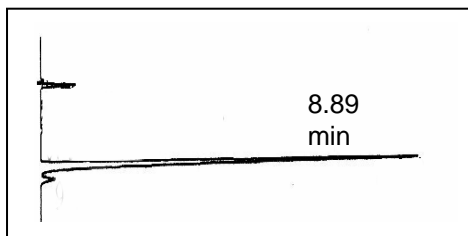

Compd. 25 H<sub>2</sub>O/CH<sub>3</sub>CN = 66 : 34

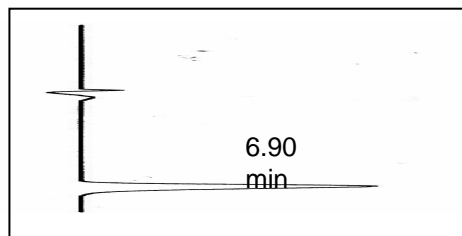

Compd. 29 H<sub>2</sub>O/CH<sub>3</sub>CN = 76 : 24

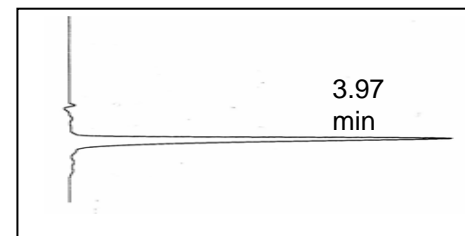

Compd. 22 H<sub>2</sub>O/CH<sub>3</sub>CN = 77 : 23

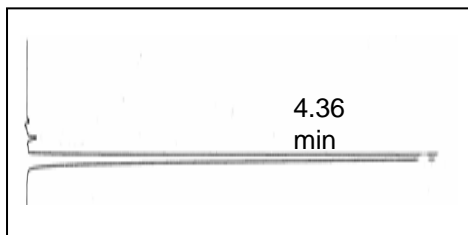

Compd. 26 H<sub>2</sub>O/CH<sub>3</sub>CN = 72 : 28

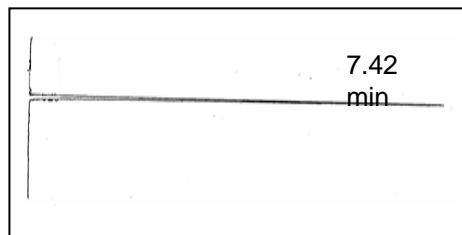

Compd. 30 H<sub>2</sub>O/CH<sub>3</sub>CN = 72 : 28

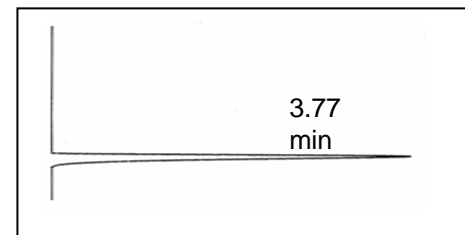

Compd. 23 H<sub>2</sub>O/CH<sub>3</sub>CN = 74 : 26

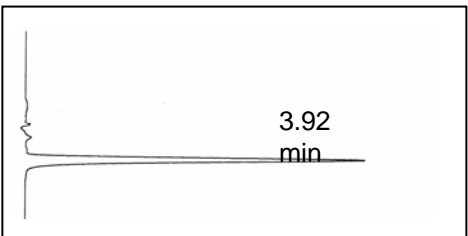

Compd. 27 H<sub>2</sub>O/CH<sub>3</sub>CN = 72 : 28

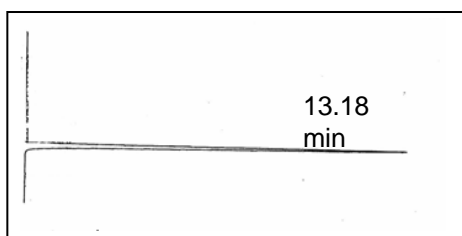

Compd. 31 H<sub>2</sub>O/CH<sub>3</sub>CN = 71 : 29

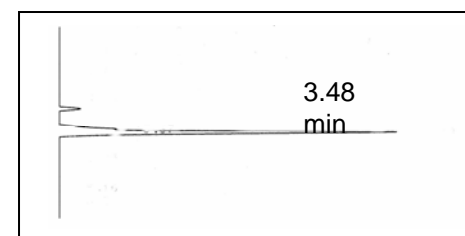

Fig. S2. HPLC charts of purified samples of novel synthetic compounds **20-31**. HPLC solvents were H<sub>2</sub>O and CH<sub>3</sub>CN, both containing 0.1% (v/v) TFA. A Cosmosil 5C18-AR column (4.6 × 250 mm, Nacalai Tesque Inc., Kyoto, Japan) was eluted with an isocratic mode (shown above each HPLC profile) at a flow rate of 1 mL/min on a Shimadzu LC-10ADvp (Shimadzu corporation, Ltd., Kyoto, Japan).

Compd. 32 H<sub>2</sub>O/CH<sub>3</sub>CN = 82 : 18

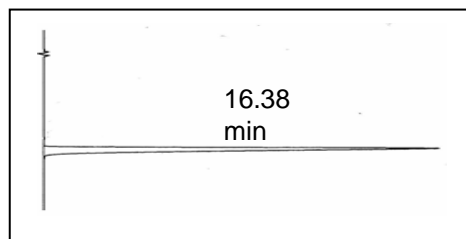

Compd. 36 H<sub>2</sub>O/CH<sub>3</sub>CN = 73 : 27

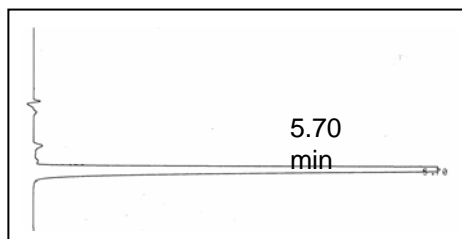

Compd. 40 H<sub>2</sub>O/CH<sub>3</sub>CN = 71 : 29

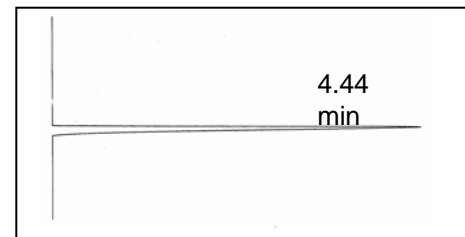

Compd. 33 H<sub>2</sub>O/CH<sub>3</sub>CN = 80 : 20

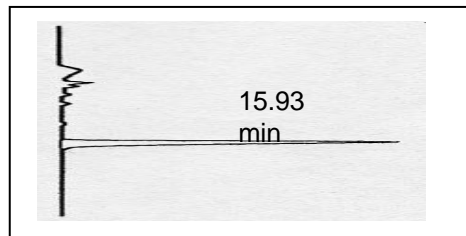

Compd. 37 H<sub>2</sub>O/CH<sub>3</sub>CN = 75 : 25

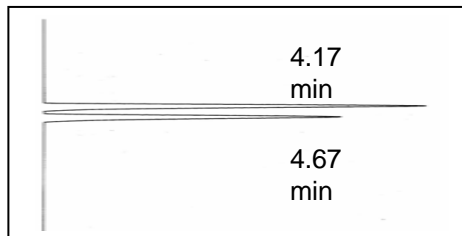

Compd. 41 H<sub>2</sub>O/CH<sub>3</sub>CN = 73 : 27

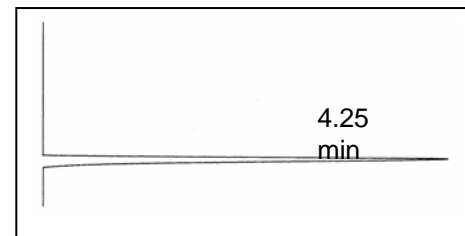

Compd. 34 H<sub>2</sub>O/CH<sub>3</sub>CN = 79 : 21

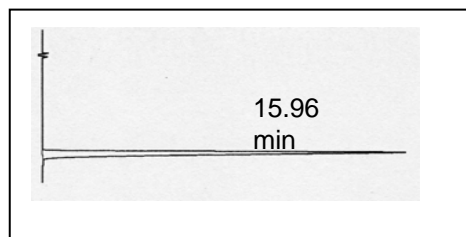

Compd. 38 H<sub>2</sub>O/CH<sub>3</sub>CN = 71 : 29

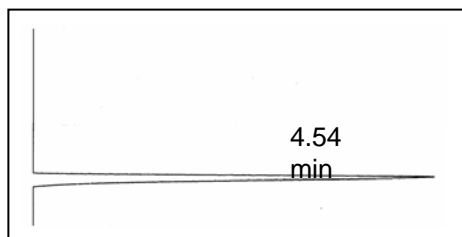

Compd. 42 H<sub>2</sub>O/CH<sub>3</sub>CN = 74 : 26

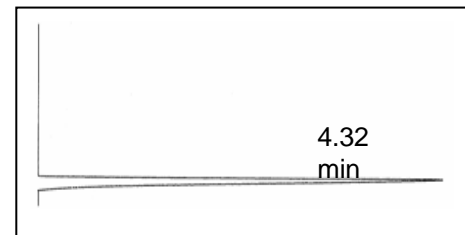

Compd. 35 H<sub>2</sub>O/CH<sub>3</sub>CN = 72 : 28

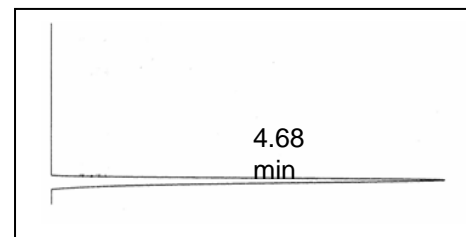

Compd. 39 H<sub>2</sub>O/CH<sub>3</sub>CN = 72 : 28

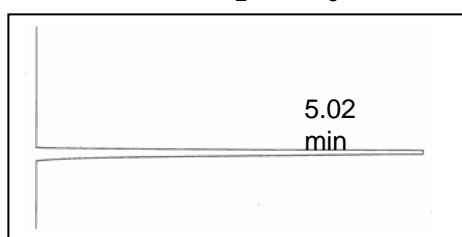

Compd. 43 H<sub>2</sub>O/CH<sub>3</sub>CN = 74 : 26

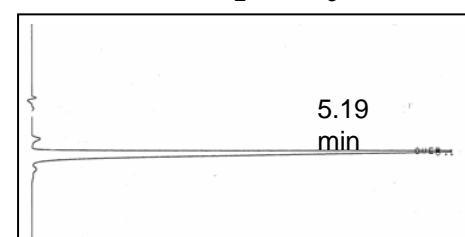

Fig. S3. HPLC charts of purified samples of novel synthetic compounds **32-43**. HPLC solvents were H<sub>2</sub>O and CH<sub>3</sub>CN, both containing 0.1% (v/v) TFA. A Cosmosil 5C18-AR column (4.6 × 250 mm, Nacalai Tesque Inc., Kyoto, Japan) was eluted with an isocratic mode (shown above each HPLC profile) at a flow rate of 1 mL/min on a Shimadzu LC-10ADvp (Shimadzu corporation, Ltd., Kyoto, Japan).
